# Supplementary material for: Versatile, stable, and air-tolerant triplet–triplet annihilation upconversion block copolymer micelles
Source: Royal Society of Chemistry journal article supplement (doi:10.1039/d2py00596d), 2022-01-01
Supplement: d2py00596d1.pdf [file d2py00596d1.pdf]

Supplementary Information for

**Versatile, Stable, and Air-Tolerant Triplet-Triplet Annihilation Upconversion  
Block Copolymer Micelles**

Huanzhi Yang,<sup>a</sup> Shaowei Guo,<sup>a</sup> Bixin Jin,<sup>a</sup> Yunjun Luo,<sup>a,b</sup> Xiaoyu Li<sup>\*a,b,c</sup>

E-mail: xiaoyuli@bit.edu.cn.

**Synthesis and characterization.**

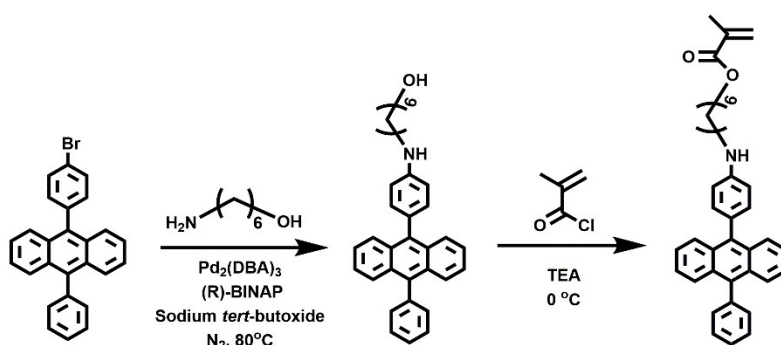

**Figure S1** Synthesis of the DPA-containing monomer DPAMA.

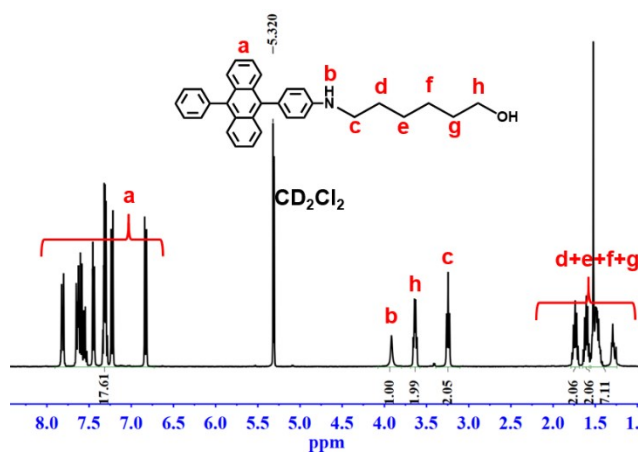

**Figure S2**  $^1\text{H}$  NMR spectrum of DPA( $\text{CH}_2$ ) $_6$ OH.

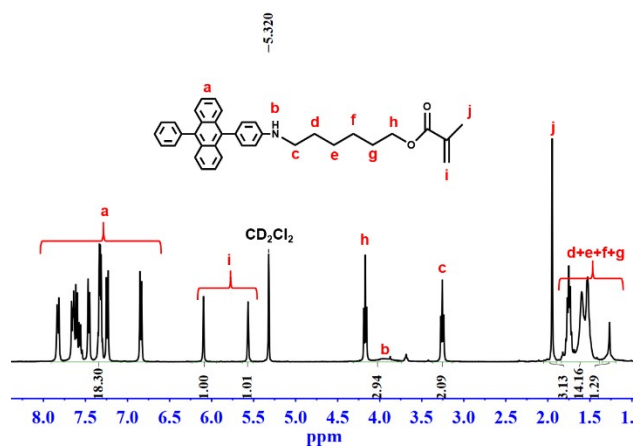

Figure S3  $^1\text{H}$  NMR spectrum of DPAMA.

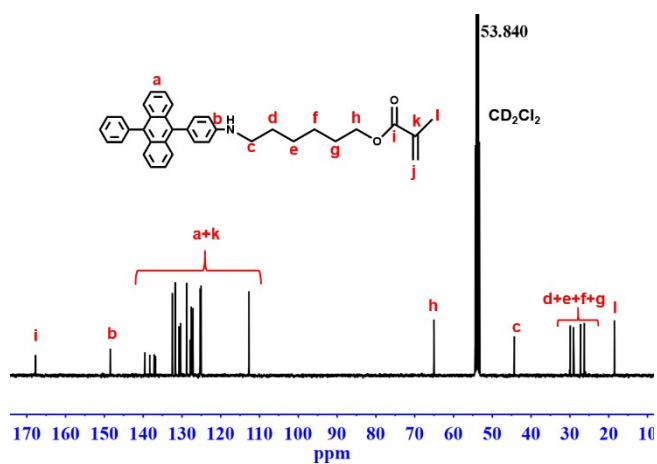

Figure S4  $^{13}\text{C}$  NMR spectrum of DPAMA.

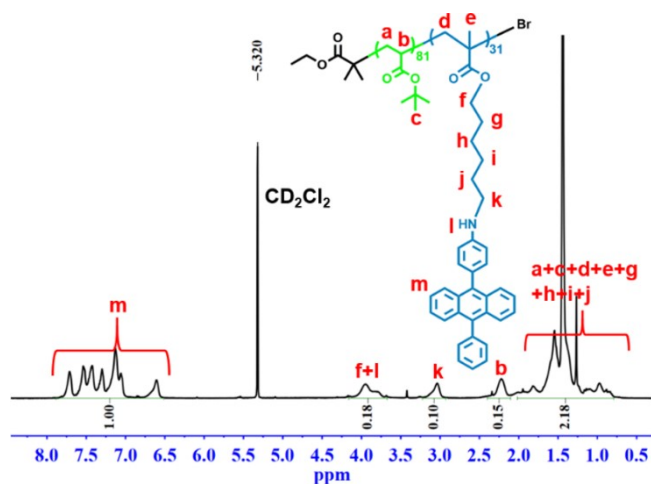

Figure S5  $^1\text{H}$  NMR spectrum of PtBA-*b*-PDPAMA diblock copolymer.

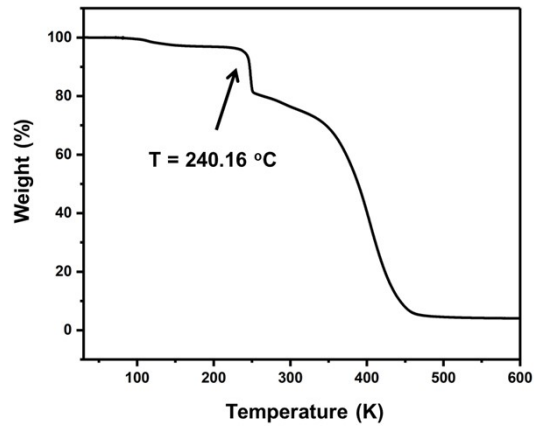

**Figure S6** TGA trace of the *PtBA-b-PDPAMA*-diblock copolymer.

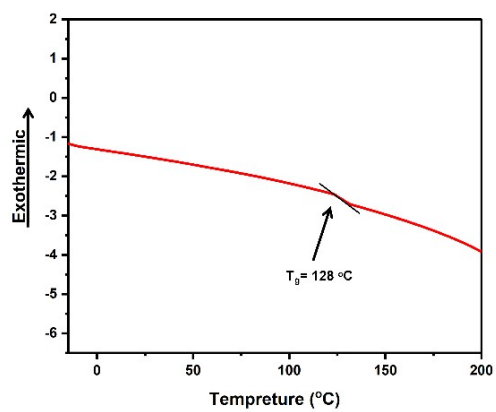

**Figure S7** DSC trace of *PtBA-b-PDPAMA*-diblock copolymer.

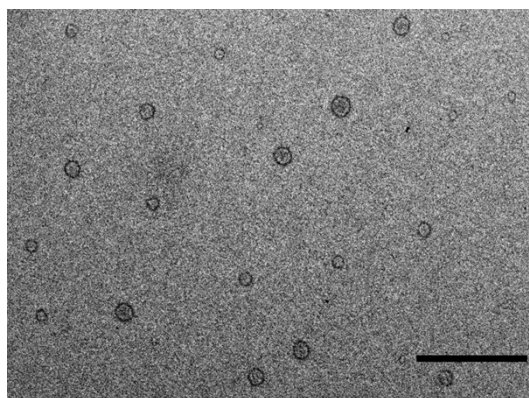

**Figure S8** EM image of the UC micelles after hydrolysis of the *PtBA* chains and staining with uranyl acetate. Scale bar is 500 nm.

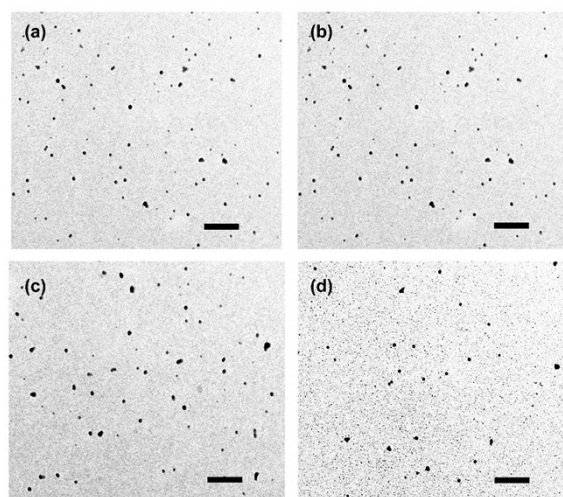

**Figure S9** EM image of the UC micelles co-assembled in (a) *n*-butanol, (b) acetone, (c) 1,4-dioxane, (d) *n*-butyl acetate. Scale bars are 500 nm.

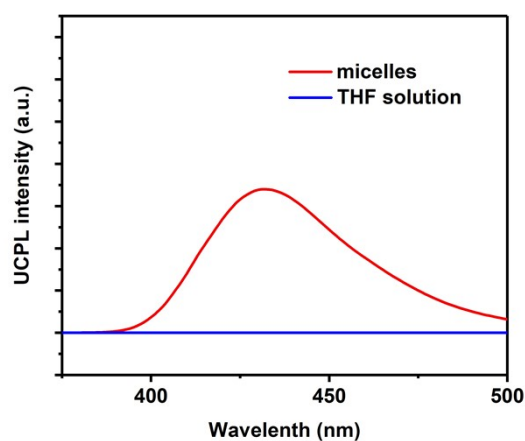

**Figure S10** PL spectra ( $\lambda_{\text{ex}} = 532 \text{ nm}$ ) of the UC micelles in *n*-butanol (red), and the dissolved diblock copolymer and PtOEP in THF (blue) at 77 K.

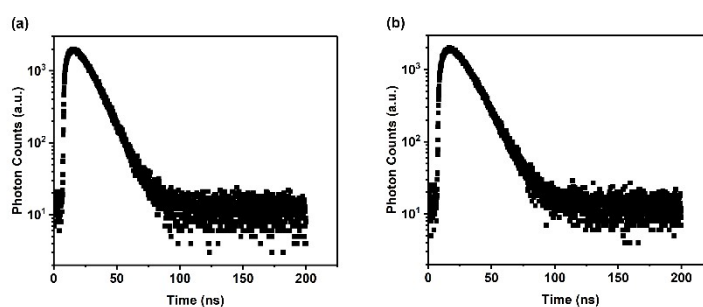

**Figure S11** Phosphorescence decays of the *n*-butanol solutions of (a) pure PtBA-b-PDPAMA micelles, (b) UC micelles irradiated at 360 nm.

**Table S1** Characterization results of PtBA-*b*-PDPAMA micelles.

| Solution                | Diameter from<br>EM image (nm) | $D_h$ from<br>DLS (nm) | PDI from<br>DLS |
|-------------------------|--------------------------------|------------------------|-----------------|
| <i>n</i> -Butanol       | 55                             | 61                     | 0.203           |
| Acetone                 | 57                             | 65                     | 0.176           |
| 1,4-Dioxane             | 49                             | 57                     | 0.183           |
| <i>n</i> -Butyl acetate | 52                             | 59                     | 0.166           |
